# Supplementary material
Source: Springer Nature journal article supplement (https://www.springermedizin.de/resource/supplementary/12875_2014_1066_MOESM5_ESM.pdf/9436074)
Supplement: MOESM5 [file 9436074]

**Table 1.** Details of the tool and the PA counselling consultations and proposed Behavioural Change Techniques [29]

| <b>Condition 1: Tool</b>                                    |                                                     |                                                            |
|-------------------------------------------------------------|-----------------------------------------------------|------------------------------------------------------------|
|                                                             | <b>Proposed Behavioural Change Techniques (BCT)</b> | <b>Number according to BCT Taxonomy Abraham and Michie</b> |
| <b>Tool widget (continuous)</b>                             | Prompt specific goal setting                        | 10                                                         |
|                                                             | Provide feedback on performance                     | 13                                                         |
|                                                             | Prompt review of behavioural goals                  | 11                                                         |
| <b>Tool sessions</b>                                        | Provide general encouragement                       | 6                                                          |
|                                                             | Provide general information                         | 1                                                          |
|                                                             | Provide information on consequences                 | 2                                                          |
|                                                             | Prompt intention formation                          | 4                                                          |
|                                                             | Plan social support/social change                   | 20                                                         |
|                                                             | Prompt barrier identification                       | 5                                                          |
| <b>Condition 1 and 2: Self-management Support Programme</b> |                                                     |                                                            |
| <b>Consultation 1</b>                                       | Provide general information                         | 1                                                          |
|                                                             | Motivational interviewing                           | 24                                                         |
|                                                             | Provide general encouragement                       | 6                                                          |
|                                                             | Provide information on consequences                 | 2                                                          |
|                                                             | Prompt intention formation                          | 4                                                          |
| <b>Consultation 2</b>                                       | Provide general encouragement                       | 6                                                          |
|                                                             | Motivational interviewing                           | 24                                                         |
|                                                             | Prompt specific goal setting                        | 10                                                         |
|                                                             | Plan social support/social change                   | 20                                                         |
| <b>Consultation 3</b>                                       | Provide general encouragement                       | 6                                                          |
|                                                             | Provide feedback on performance                     | 13                                                         |
|                                                             | Motivational interviewing                           | 24                                                         |
|                                                             | Prompt review of behavioural goals                  | 11                                                         |
|                                                             | Prompt barrier identification                       | 5                                                          |
|                                                             | Relapse prevention                                  | 23                                                         |
| <b>Consultation 4</b>                                       | Provide general encouragement                       | 6                                                          |
|                                                             | Provide feedback on performance                     | 13                                                         |
|                                                             | Motivational interviewing                           | 24                                                         |
|                                                             | Prompt review of behavioural goals                  | 11                                                         |
|                                                             | Prompt barrier identification                       | 5                                                          |
|                                                             | Relapse prevention                                  | 23                                                         |
